# Supplementary material for: Natural selection plays a significant role in governing the codon usage bias in the novel SARS-CoV-2 variants of concern (VOC)
Source: PeerJ. 2022 Jun 23;10:e13562. doi: 10.7717/peerj.13562 (PMC9233899; doi:10.7717/peerj.13562)
Supplement: Supplemental Information 1 [file peerj-10-13562-s001.xlsx]

## Sheet: All_indices
Virus_strain	U	C	A	G	U3s	C3s	A3s	G3s	CAI	ENC	GC3s	GC12	GC
alpha	0.332388	0.18859	0.293968	0.184132	0.548207	0.189073	0.377143	0.133542	0.646	44.298	0.2671	42.555	0.373084
beta	0.331104	0.187942	0.292341	0.182993	0.548484	0.189317	0.376625	0.132109	0.646	44.1809	0.2654	42.375	0.37319
gamma	0.334632	0.187882	0.293943	0.183033	0.549118	0.188171	0.378202	0.132465	0.646	44.1047	0.2657	42.355	0.371457
delta	0.331876	0.188253	0.29416	0.184197	0.54895	0.18781	0.377806	0.132302	0.645	44.3414	0.2653	42.605	0.373018
SARS-CoV-2	0.332548	0.189168	0.294349	0.183935	0.5483	0.1887	0.3773	0.1333	0.646	44.16	0.2669	42.62	0.373
Human	0.281691	0.193973	0.280788	0.194773	0.374352	0.2706	0.365268	0.245252	0.68752	52.4584	38.87	38.875	0.4274
Omicron_BA.1	0.330485	0.186825	0.294785	0.183127	0.546936	0.187337	0.381175	0.136106	0.648135	44.7383	26.56	42.215	0.37197
Omicron_BA.2	0.333447	0.18703	0.294599	0.184221	0.549166	0.1871	0.378712	0.13559	0.646944	44.6687	26.63	42.37	0.371899
MG772933_bat	0.330126	0.197808	0.285485	0.186581	0.534	0.2132	0.3352	0.1599	0.659	46.14	30.63	42.345	0.385
MG772934_bat	0.333066	0.195024	0.286517	0.185393	0.5396	0.2066	0.3435	0.1534	0.655	45.93	29.61	42.255	0.381
MW251308_bat	0.329262	0.194897	0.281759	0.194082	0.523	0.2031	0.3541	0.1595	0.646	47.97	29.97	43.36	0.389
MN996532_bat	0.329134	0.192126	0.295276	0.183465	0.5443	0.1938	0.3764	0.133	0.649	44.52	27.09	42.795	0.376
MT040333_pangolin	0.321504	0.194795	0.299947	0.183754	0.5112	0.2093	0.4015	0.1253	0.647	44.82	28	42.785	0.379
MT040334_pangolin	0.321222	0.194576	0.300421	0.183781	0.5103	0.2101	0.4015	0.1265	0.647	44.81	28.12	42.69	0.379
MT040335_pangolin	0.321767	0.194532	0.299947	0.183754	0.5117	0.2095	0.4015	0.1253	0.647	44.79	28	42.745	0.379
MT040336_pangolins	0.321504	0.195058	0.299947	0.183491	0.5117	0.2095	0.4011	0.1252	0.647	44.8	28	42.785	0.379
MT072864_pangolins	0.321522	0.194488	0.3	0.183465	0.5108	0.2095	0.4022	0.1252	0.644	44.79	27.95	42.72	0.379
MT121216_pangolins	0.322538	0.194839	0.302528	0.180095	0.514	0.216	0.4031	0.1125	0.65	44.17	27.73	42.38	0.375
MERS	0.328353	0.197399	0.262184	0.212064	0.5467	0.2267	0.2779	0.1831	0.6595	47.69	35.25	43.795	0.409
SARS-CoV	0.332803	0.200637	0.279459	0.187102	0.5483	0.2137	0.3322	0.1486	0.664	45.73	30.1	43.115	0.388

## Sheet: Complete_RSCU_table
			Spike protein									Bat				Pangolin
Amino acids	Codon	Host	SARS_CoV-2	SARS_CoV	MERS-CoV	Alpha	Beta	Gamma	Delta	Omicron_lineage_BA.2	Omicron_lineage_BA.1	MG772933_bat	MG772934_bat	MW251308_bat	MN996532_bat	MT040333_pangolin	MT040334_pangolin	MT040335_pangolin	MT040336_pangolin	MT072864_pangolin	MT121216_pangolin
Phenylalanine	UUU (F)	1.32	1.53	1.42	1.31	1.53	1.53	1.54	1.55	1.49	1.52	1.41	1.51	1.67	1.39	1.53	1.53	1.53	1.53	1.52	1.45
	UUC (F)	0.68	0.47	0.58	0.69	0.47	0.47	0.46	0.45	0.51	0.48	0.59	0.49	0.33	0.61	0.47	0.47	0.47	0.47	0.48	0.55
Leucine	UUA (L)	1.12	1.56	1.15	1.24	1.56	1.53	1.57	1.57	1.52	1.52	1.29	1.53	1.5	1.43	1.41	1.39	1.41	1.41	1.43	1.46
	UUG (L)	1.06	1.11	0.79	1.44	1.11	1.14	1.12	1.12	1.12	1.12	1.18	1.08	1.11	0.88	0.86	0.86	0.81	0.81	0.8	0.93
	CUU (L)	1.1	2	2.06	1.74	2	1.97	1.98	2.02	2.02	1.96	1.91	1.87	1.83	2.09	2.05	2.04	2.05	2.05	2.02	1.92
	CUC (L)	0.92	0.67	1.15	0.7	0.67	0.68	0.65	0.67	0.67	0.73	1.01	1.02	0.78	0.66	0.59	0.64	0.65	0.65	0.64	0.87
	CUA (L)	0.7	0.5	0.61	0.44	0.5	0.51	0.51	0.5	0.5	0.5	0.45	0.34	0.44	0.77	0.86	0.86	0.86	0.86	0.9	0.76
	CUG (L)	1.1	0.17	0.24	0.44	0.17	0.17	0.17	0.11	0.17	0.17	0.17	0.17	0.33	0.17	0.22	0.21	0.22	0.22	0.21	0.06
Serine	UCU (S)	1.49	2.24	2.53	2.15	2.27	2.24	2.26	2.24	2.29	2.29	2.34	2.32	1.9	2.35	1.83	1.83	1.83	1.88	1.85	2.16
	UCC (S)	1.02	0.73	0.44	0.73	0.73	0.72	0.71	0.73	0.62	0.62	0.54	0.53	0.63	0.43	0.63	0.63	0.63	0.62	0.64	0.42
	UCA (S)	1.32	1.58	1.77	1.18	1.53	1.58	1.55	1.58	1.61	1.55	1.38	1.43	1.73	1.61	1.96	1.96	1.96	1.94	1.91	1.8
	UCG (S)	0.15	0.12	0.19	0.16	0.12	0.12	0.12	0.12	0.12	0.12	0.3	0.24	0.17	0.19	0.13	0.13	0.13	0.12	0.13	0.06
	AGU (S)	1.08	1.03	0.69	1.33	1.04	1.03	1.07	1.03	1.05	1.17	0.84	1.01	1.15	0.87	1.2	1.2	1.2	1.19	1.21	1.14
	AGC (S)	0.94	0.3	0.38	0.45	0.31	0.3	0.3	0.3	0.31	0.25	0.6	0.48	0.4	0.56	0.25	0.25	0.25	0.25	0.26	0.42
Proline	CCU (P)	1.37	2	2.32	2.08	1.96	1.99	1.96	1.97	1.93	1.91	1.89	1.69	2.4	1.93	1.89	1.96	1.93	1.93	1.93	1.93
	CCC (P)	1.01	0.28	0.21	0.58	0.28	0.28	0.28	0.28	0.21	0.27	0.38	0.62	0.56	0.21	0.49	0.44	0.43	0.43	0.43	0.15
	CCA (P)	1.41	1.72	1.33	1.17	1.76	1.73	1.75	1.75	1.86	1.82	1.74	1.54	0.96	1.86	1.4	1.45	1.43	1.43	1.43	1.78
	CCG (P)	0.21	0	0.14	0.17	0	0	0	0	0	0	0	0.15	0.08	0	0.21	0.15	0.21	0.21	0.21	0.15
Isoleucine	AUU (I)	1.27	1.74	2.12	1.71	1.72	1.74	1.75	1.74	1.72	1.73	1.65	1.66	1.76	1.9	1.63	1.63	1.63	1.63	1.63	1.65
	AUC (I)	0.68	0.55	0.35	0.54	0.58	0.55	0.55	0.55	0.54	0.58	0.66	0.58	0.48	0.38	0.57	0.57	0.57	0.57	0.57	0.52
	AUA (I)	1.05	0.71	0.54	0.75	0.7	0.71	0.7	0.71	0.74	0.69	0.7	0.76	0.76	0.72	0.8	0.8	0.8	0.8	0.8	0.83
Methionine	AUG (M)	1	1	1	1	1	1	1	1	1	1	1	1	1	1	1	1	1	1	1	1
Threonine	ACU (T)	1.28	1.81	1.86	1.94	1.83	1.82	1.79	1.83	1.83	1.83	1.74	1.72	1.43	1.71	1.47	1.47	1.47	1.49	1.47	1.45
	ACC (T)	0.91	0.41	0.48	0.69	0.42	0.41	0.38	0.42	0.43	0.43	0.4	0.36	0.52	0.49	0.49	0.49	0.49	0.48	0.49	0.44
	ACA (T)	1.6	1.65	1.49	1.19	1.63	1.65	1.67	1.59	1.62	1.62	1.58	1.64	1.74	1.63	1.92	1.92	1.92	1.9	1.92	1.86
	ACG (T)	0.2	0.12	0.16	0.18	0.12	0.12	0.17	0.16	0.13	0.13	0.28	0.28	0.3	0.16	0.12	0.12	0.12	0.12	0.12	0.24
Valine	GUU (V)	1.16	1.98	2.07	1.81	2	1.97	1.96	1.98	2	2	1.93	1.93	1.8	2.04	2.23	2.23	2.23	2.23	2.23	2.44
	GUC (V)	0.74	0.87	0.84	0.73	0.83	0.86	0.87	0.86	0.88	0.83	0.85	0.92	0.69	0.89	0.74	0.74	0.74	0.74	0.74	0.63
	GUA (V)	0.9	0.62	0.53	0.71	0.62	0.66	0.62	0.62	0.62	0.63	0.58	0.55	0.82	0.43	0.41	0.41	0.41	0.41	0.41	0.46
	GUG (V)	1.2	0.54	0.57	0.74	0.54	0.52	0.54	0.54	0.5	0.54	0.63	0.6	0.69	0.64	0.62	0.62	0.62	0.62	0.62	0.46
Alanine	GCU (A)	1.3	2.13	2.35	2.11	2.08	2.15	2.12	2.13	2.15	2.07	2.59	2.59	1.95	2.05	2.21	2.21	2.21	2.21	2.21	2
	GCC (A)	1.11	0.41	0.56	0.61	0.41	0.41	0.41	0.41	0.4	0.41	0.59	0.54	0.64	0.65	0.53	0.53	0.53	0.53	0.53	0.63
	GCA (A)	1.36	1.37	0.85	0.99	1.42	1.33	1.37	1.37	1.35	1.42	0.63	0.68	1.27	1.2	1.26	1.26	1.26	1.26	1.26	1.37
	GCG (A)	0.23	0.1	0.24	0.28	0.1	0.1	0.1	0.1	0.1	0.1	0.2	0.2	0.14	0.1	0	0	0	0	0	0
Tyrosine	UAU (Y)	1.29	1.48	1.33	1.28	1.48	1.49	1.51	1.48	1.54	1.55	1.45	1.45	1.56	1.38	1.13	1.11	1.13	1.13	1.13	1.23
	UAC (Y)	0.71	0.52	0.67	0.72	0.52	0.51	0.49	0.52	0.46	0.45	0.55	0.55	0.44	0.62	0.87	0.89	0.87	0.87	0.87	0.77
Cysteine	UGU (C)	1.17	1.4	1.08	1.2	1.4	1.4	1.4	1.4	1.4	1.4	1.42	1.42	1.21	1.3	1.3	1.3	1.3	1.3	1.3	1.35
	UGC (C)	0.83	0.6	0.92	0.8	0.6	0.6	0.6	0.6	0.6	0.6	0.58	0.58	0.79	0.7	0.7	0.7	0.7	0.7	0.7	0.65
Tryptophan	UGG (W)	1	1	1	1	1	1	1	1	1	1	1	1	1	1	1	1	1	1	1	1
Histidine	CAU (H)	1.1	1.53	1.73	1.33	1.45	1.53	1.5	1.53	1.48	1.45	1.41	1.37	1.08	1.56	1.5	1.5	1.5	1.5	1.53	1.29
	CAC (H)	0.9	0.47	0.27	0.67	0.55	0.47	0.5	0.47	0.52	0.55	0.59	0.63	0.92	0.44	0.5	0.5	0.5	0.5	0.47	0.71
Arginine	CGU (R)	0.31	1.29	1.08	1.99	1.29	1.29	1.32	1.36	1.26	1.23	1.17	1.02	0.92	1.54	1.02	1.02	1.02	1.02	1.02	1.2
	CGC (R)	0.29	0.14	0.46	1.07	0	0.14	0.15	0.14	0.14	0.14	0.44	0.59	0.92	0.15	0.44	0.44	0.44	0.44	0.44	0.15
	CGA (R)	0.27	0	0.62	0.45	0	0	0	0	0.27	0.26	0.15	0.15	0.31	0	0	0	0	0	0	0.3
	CGG (R)	0.34	0.29	0.15	0.35	0.29	0.29	0.29	0.41	0.28	0.27	0	0	0.15	0	0	0	0	0	0	0
	AGA (R)	2.68	2.86	1.85	1.21	2.86	2.86	2.93	2.73	2.65	2.73	2.78	2.93	2.15	2.62	3.37	3.37	3.37	3.37	3.37	3.6
	AGG (R)	2.12	1.43	1.85	0.92	1.43	1.41	1.32	1.36	1.4	1.37	1.46	1.32	1.54	1.69	1.17	1.17	1.17	1.17	1.17	0.75
Glutamine	CAA (Q)	0.96	1.48	1.6	1.1	1.42	1.48	1.48	1.44	1.46	1.46	1.26	1.3	1.37	1.43	1.58	1.56	1.58	1.58	1.58	1.45
	CAG (Q)	1.04	0.52	0.4	0.9	0.59	0.52	0.52	0.56	0.54	0.54	0.74	0.7	0.63	0.57	0.42	0.44	0.42	0.42	0.42	0.55
Asparagine	AAU (N)	1.25	1.23	1.31	1.44	1.22	1.23	1.2	1.24	1.21	1.2	1.3	1.35	1.38	1.34	1.2	1.2	1.2	1.19	1.2	1.07
	AAC (N)	0.75	0.77	0.69	0.56	0.78	0.77	0.8	0.76	0.79	0.8	0.7	0.65	0.62	0.66	0.8	0.8	0.8	0.81	0.8	0.93
Lysine	AAA (K)	1.32	1.25	1.13	0.99	1.25	1.28	1.28	1.28	1.26	1.28	1.34	1.37	1.31	1.4	1.37	1.34	1.34	1.34	1.34	1.41
	AAG (K)	0.68	0.75	0.87	1.01	0.75	0.72	0.72	0.72	0.74	0.72	0.66	0.63	0.69	0.6	0.63	0.66	0.66	0.66	0.66	0.59
Aspartate	GAU (D)	1.18	1.39	1.37	1.3	1.41	1.36	1.37	1.38	1.41	1.39	1.26	1.28	1.09	1.34	1.15	1.15	1.15	1.16	1.15	1.17
	GAC (D)	0.82	0.61	0.63	0.7	0.59	0.64	0.63	0.62	0.59	0.61	0.74	0.72	0.91	0.66	0.85	0.85	0.85	0.84	0.85	0.83
Glutamate	GAA (E)	1.09	1.42	1	1.06	1.42	1.4	1.4	1.44	1.4	1.39	0.95	0.95	1.02	1.23	1.21	1.21	1.21	1.21	1.21	1.42
	GAG (E)	0.91	0.58	1	0.94	0.1	0.6	0.6	0.56	0.6	0.61	1.05	1.05	0.98	0.77	0.79	0.79	0.79	0.79	0.79	0.58
Glycine	GGU (G)	0.89	2.29	1.52	2.11	2.31	2.33	2.31	2.27	2.24	2.23	1.92	1.97	2.27	2.2	1.88	1.86	1.88	1.86	1.88	1.98
	GGC (G)	0.9	0.73	1.27	1.06	0.72	0.72	0.72	0.72	0.73	0.76	0.91	0.85	0.76	0.63	0.71	0.71	0.71	0.71	0.71	0.89
	GGA (G)	1.21	0.83	1.01	0.56	0.82	0.81	0.82	0.87	0.83	0.86	1.07	1.12	0.81	1.07	1.32	1.33	1.32	1.33	1.32	0.99
	GGG (G)	1	0.15	0.2	0.27	0.14	0.14	0.14	0.14	0.2	0.15	0.11	0.05	0.16	0.1	0.09	0.1	0.09	0.1	0.09	0.15
	Those codons found preferred in all variants with respect to host. (cut off diff. Between RSCU value >0.2)
	Those codons found preferred in all SARS-CoV-2 genomes with respect to host (RSCU value difference ≥0.2 and RSCU>1) are highlighted in purple, and the codon shows under-preference with respect to host (RSCU value difference ≥0.2 and RSCU<1) are highlighted in yellow.
	Over-preferred: purple, under-preferred: yellow

## Sheet: dinucleotide_odds_ratio
Dinucleotide	Host	MERS	SARS-CoV	SARS-CoV-2	Alpha	Beta	Gamma	Delta	Omicron_BA.1	Omicron_BA.2	MG772933_bat	MG772934_bat	MW251308_bat	MN996532_bat	MT040333_pangolin	MT040334_pangolin	MT040335_pangolin	MT040336_pangolins	MT072864_pangolins	MT121216_pangolins
AA	1.48704	1.15049	1.37616	1.52421	1.52178	1.5181	1.52342	1.5375	1.53144	1.52705	1.3861	1.39149	1.32935	1.55001	1.54404	1.54648	1.54404	1.53984	1.54161	1.59284
AC	0.767547	0.935447	1.00664	1.03847	1.03527	1.03051	1.03367	1.03301	1.01639	1.01908	1.07807	1.0661	1.02091	1.05014	1.15698	1.15881	1.15698	1.16119	1.15936	1.17145
AG	1.06598	0.889275	0.756039	0.875164	0.871307	0.86858	0.866223	0.863954	0.891633	0.872151	0.834225	0.839176	0.916644	0.856918	0.891927	0.901765	0.896135	0.896135	0.894723	0.876481
AU	1.17205	1.2188	1.32944	1.26878	1.27187	1.25638	1.27664	1.26881	1.27353	1.29214	1.26631	1.28445	1.23812	1.26437	1.20326	1.19673	1.19905	1.19905	1.20137	1.19673
CA	1.10291	1.01135	1.18503	1.26878	1.27064	1.26178	1.26242	1.2563	1.25839	1.2581	1.21497	1.22023	1.15124	1.22657	1.33789	1.34422	1.33789	1.33789	1.33578	1.31894
CC	0.783538	0.575562	0.552164	0.531798	0.528084	0.529966	0.518628	0.526359	0.516649	0.506983	0.521925	0.500937	0.54738	0.541875	0.538522	0.526732	0.530108	0.530108	0.529273	0.526732
CG	0.152327	0.359885	0.220865	0.121434	0.121607	0.121337	0.125574	0.133452	0.124793	0.133368	0.213904	0.214076	0.251968	0.155421	0.168288	0.16434	0.168288	0.168288	0.168023	0.16434
CU	1.06479	1.21184	1.25299	1.10547	1.09774	1.09407	1.10016	1.09656	1.08962	1.09466	1.21497	1.18598	1.16861	1.15096	1.07284	1.07875	1.07704	1.08546	1.07955	1.10824
GA	0.911042	0.794403	0.785771	0.799791	0.795623	0.775758	0.786747	0.79549	0.804843	0.792748	0.834225	0.839176	0.781971	0.814912	0.833027	0.834343	0.833027	0.837234	0.831714	0.813274
GC	0.646224	0.783018	0.73905	0.573672	0.574399	0.56727	0.57288	0.573644	0.574658	0.582708	0.633155	0.607974	0.708118	0.588081	0.605838	0.611009	0.605838	0.605838	0.604883	0.589939
GG	0.789731	0.657786	0.620122	0.569484	0.574398	0.574396	0.56476	0.577212	0.5556	0.57456	0.564706	0.556596	0.57779	0.571279	0.555351	0.552015	0.555351	0.551144	0.554476	0.51409
GU	0.769371	1.15808	0.849482	1.00079	1.00229	1.01043	1.00485	1.00121	0.995313	0.998112	0.954011	0.96334	1.03828	0.961932	0.946621	0.943903	0.946621	0.942414	0.94513	0.964972
UA	0.991619	1.23778	1.12132	1.11384	1.11223	1.1178	1.12736	1.11395	1.11794	1.13253	1.12941	1.13032	1.24247	1.12996	1.08125	1.07875	1.08125	1.08125	1.08375	1.11246
UC	0.906256	0.864609	0.913193	0.883538	0.880238	0.879331	0.881553	0.879624	0.882011	0.884286	0.93262	0.946214	0.842791	0.894723	0.816198	0.817488	0.820405	0.824612	0.819113	0.830129
UG	1.10834	1.48634	1.3974	1.37765	1.37941	1.3639	1.37266	1.37298	1.35771	1.36806	1.37326	1.35724	1.35976	1.35259	1.32527	1.32315	1.32106	1.32106	1.31478	1.32736
UU	1.50085	1.66534	1.89435	1.94713	1.94743	1.93708	1.97371	1.9445	1.93	1.9515	1.84813	1.89671	1.8246	1.89026	1.92269	1.92152	1.9269	1.91849	1.91966	1.89202
